# Supplementary material for: Polyelectrolyte uptake by PEMs: Impact of salt concentration
Source: Royal Society of Chemistry journal article supplement (doi:10.1039/c1py00280e), 2011-01-01
Supplement: c1py00280e.pdf [file c1py00280e.pdf]

## Electronic Supplementary Information

# Polyelectrolyte Uptake by PEMs: Impact of Salt Concentration

Xingjie Zan, Bo Peng, David A. Hoagland, and Zhaohui Su

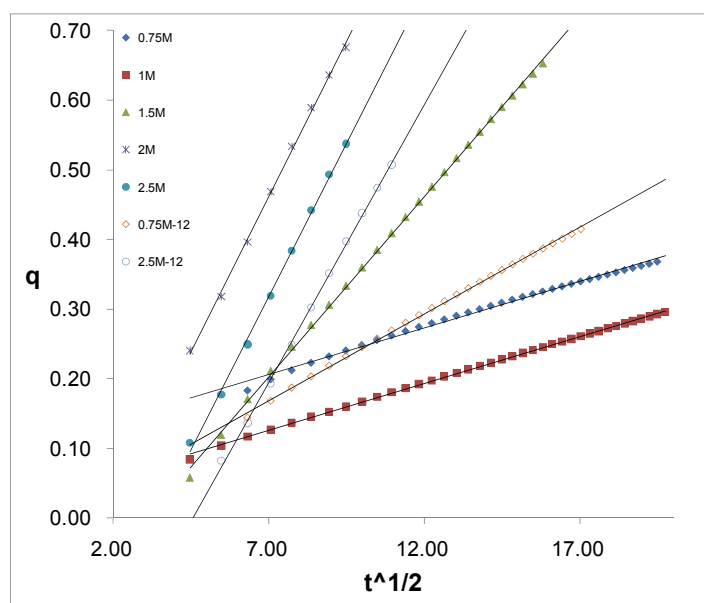

Figure E-1.  $q$  vs  $t^{1/2}$  plots for all salt concentrations at small  $t$ .
